# Supplementary material
Source: MDPI journal article supplement (https://www.mdpi.com/2076-3298/11/3/60)
Supplement: s1 [file s1 › Supplement Table -rev.xlsx]

## Sheet: Table S1
Table S1. The total number of reads
Sample Name	No. Reads	No. Reads after Quality Filter	No. Assembled Reads	No. Reads Without N	No. Reads Fit Length	No. Unique Reads	No. Denoised Haploids	No. Species
Autumn	4193618	4193352	2319147	2319146	2109438	145944	253	220
Summer	2406602	2400978	1317194	1265594	1022814	67466	230	194
Total	6600220	6594330	3636341	3584740	3132252	213410	483	414

## Sheet: Table S2
Table S2. List of fish species in both seasons
Family	Species	Common name	Migatory	Climate	Importance	Summer	Autumn
Cepolidae	Acanthocepola krusensternii	Red-spotted bandfish	marine	Cold-water		424	0
Gobiidae	Acanthogobius flavimanus	Yellowfin goby	amphidromous	Temperate	commercial	5824	640
Sparidae	Acanthopagrus latus	Yellowfin seabream	marine	Temperate		3716	10133
Sparidae	Acanthopagrus schlegelii	Blackhead seabream	marine	Temperate	commercial	179109	447810
Gobiidae	Acentrogobius pflaumii	Striped sandgoby	marine	Temperate		17239	76590
Gobiidae	Apocryptodon punctatus	Tabirakuchi	marine	Temperate		0	6072
Atherinidae	Atherinomorus lacunosus	Wide-banded hardyhead silverside	marine	Temperate		0	403
Callionymidae	Callionymus valenciennei	Valenciennes’ dragonet	marine	Temperate		169	290
Platycephalidae	Cociella crocodilus	Crocodile flathead	marine	Temperate		0	2122
Congridae	Conger myriaster	Whitespotted conger	oceanodromous	Warm-water		29	0
Cynoglossidae	Cynoglossus interruptus	Genko sole	marine	Warm-water	commercial	0	48
Stichaeidae	Dictyosoma burgeri	Dainanginpo	marine	Warm-water		0	4679
Embiotocidae	Ditrema temminckii	Sea chub	marine	Warm-water	commercial	16753	5460
Engraulidae	Engraulis japonicus	Japanese anchovy	oceanodromous	Warm-water	highly commercial	98171	188041
Tripterygiidae	Enneapterygius etheostomus	Hebiginpo	marine	Warm-water		1834	0
Serranidae	Epinephelus akaara	Hong Kong grouper	marine	Warm-water	minor commercial	17310	56221
Leiognathidae	Equulites rivulatus	Offshore ponyfish	marine	Warm-water		0	3364
Dussumieriidae	Etrumeus teres	Red-eye round herring	oceanodromous	Warm-water		4029	0
Gobiidae	Favonigobius gymnauchen	Sharp-nosed sand goby	amphidromous	Temperate		6664	2997
Girellidae	Girella punctata	Largescale blackfish	oceanodromous	Warm-water	commercial	5140	8283
Labridae	Halichoeres tenuispinis	Wrasse	marine	Temperate	minor commercial	2002	0
Cottidae	Hexagrammos agrammus	Spotty-bellied greenling	oceanodromous	Temperate		1741	0
Hexagrammidae	Hexagrammos stelleri	Whitespotted greenling	marine	Temperate	minor commercial	0	826
Hemiramphidae	Hyporhamphus sajori	Japanese halfbeak	amphidromous	Temperate	commercial	25750	3978
Gobiidae	Istigobius hoshinonis	Hoshinohaze	marine	Cold-water		5167	9005
Clupeidae	Konosirus punctatus	Dotted gizzard shad	amphidromous	Cold-water	minor commercial	35624	3589
Blenniidae	Laiphognathus longispinis	Crown spotty blenny	marine	Cold-water		0	6675
Lateolabracidae	Lateolabrax japonicus	Japanese seabass	catadromous	Cold-water	commercial	67091	23096
Mugilidae	Mugil cephalus	Flathead grey mullet	catadromous	Warm-water	highly commercial	66659	221541
Gobiidae	Mugilogobius abei	Abehaze	marine	Warm-water		1043	0
Muraenesocidae	Muraenesox cinereus	Daggertooth pike conger	oceanodromous	Temperate	highly commercial	3799	5605
Gobiidae	Myersina filifer	Filamentous shrimpgoby	marine	Temperate		9948	8621
Labrisomidae	Neoclinus chihiroe	Shizumiiso-koke-ginpo	marine	Temperate		5194	45898
Leiognathidae	Nuchequula nuchalis	Spotnape ponyfish	marine	Temperate		0	8146
Blenniidae	Omobranchus elegans	Nabeka	marine	Temperate		6221	27
Blenniidae	Omobranchus punctatus	Muzzled blenny	marine	Warm-water		1786	9147
Sparidae	Pagrus major	Red seabream	oceanodromous	Temperate	highly commercial	140968	274833
Blenniidae	Parablennius yatabei	Isoginpo	oceanodromous	Temperate		1577	24365
Gobiidae	Parachaeturichthys polynema	Taileyed goby	marine	Temperate		0	2122
Labridae	Parajulis poecilepterus	Multicolorfin rainbowfish	marine	Cold-water	commercial	15814	4085
Paralichthyidae	Paralichthys olivaceus	Bastard halibut	oceanodromous	Cold-water	highly commercial	0	5647
Pinguipedidae	Parapercis ommatura	Matô-toragisu	marine	Temperate	minor commercial	20	0
Gobiidae	Paratrypauchen microcephalus	Comb goby	marine	Cold-water	commercial	640	0
Sciaenidae	Pennahia argentata	Silver croaker	oceanodromous	Cold-water	commercial	182	0
Mugilidae	Planiliza haematocheilus	So-iuy mullet	catadromous	Temperate		13195	9078
Haemulidae	Plectorhinchus cinctus	Crescent sweetlips	marine	Temperate	commercial	0	12602
Pleuronectidae	Pleuronichthys cornutus	Ridged-eye flounder	marine	Temperate		6229	0
Plotosidae	Plotosus japonicus	n.a	marine	Temperate	commercial	0	620
Pleuronectidae	Pseudopleuronectes yokohamae	Marbled flounder	marine	Warm-water		1341	0
Callionymidae	Repomucenus ornatipinnis	Japanese ornate dragonet	marine	Temperate		988	2767
Monacanthidae	Rudarius ercodes	Whitespotted pygmy filefish	oceanodromous	Temperate	highly commercial	1182	9541
Clupeidae	Sardinella lemuru	Bali sardinella	oceanodromous	Tropical	highly commercial	0	20302
Clupeidae	Sardinella zunasi	Japanese sardinella	oceanodromous	Warm-water		5775	13897
Synodontidae	Saurida microlepis	Slender lizardfish	marine	Warm-water		2061	0
Scombridae	Scomberomorus niphonius	Japanese Spanish mackerel	oceanodromous	Warm-water	highly commercial	0	3025
Sebastidae	Sebastes sp.	Buccaneer rockfish	marine	Temperate		4373	6332
Sebastidae	Sebastiscus marmoratus	False kelpfish	oceanodromous	Temperate	highly commercial	17349	22142
Labridae	Semicossyphus reticulatus	Asian sheepshead wrasse	marine	Temperate	commercial	6225	27601
Carangidae	Seriola quinqueradiata	Japanese amberjack	marine	Temperate	commercial	0	23347
Siganidae	Siganus fuscescens	Mottled spinefoot	marine	Cold-water	commercial	49836	106104
Sillaginidae	Sillago japonica	Japanese sillago	marine	Temperate	highly commercial	22678	180409
Sphyraenidae	Sphyraena pinguis	Red barracuda	marine	Temperate		2699	2146
Tripterygiidae	Springerichthys bapturus	Japanese blacktail triplefin	marine	Temperate	highly commercial	1548	938
Monacanthidae	Stephanolepis cirrhifer	Threadsail filefish	oceanodromous	Cold-water	commercial	5275	33166
Belonidae	Strongylura anastomella	Datsu	marine	Temperate		3538	0
Gobiidae	Taenioides snyderi	Chi-warasubo	amphidromous	Temperate		899	0
Tetraodontidae	Takifugu niphobles	Grass puffer	marine	Temperate		24292	22228
Tetraodontidae	Takifugu pardalis	Panther puffer	marine	Temperate	commercial	20389	36216
Tetraodontidae	Takifugu vermicularis	Purple puffer	marine	Temperate		5553	0
Monacanthidae	Thamnaconus modestus	Black scraper	oceanodromous	Temperate		10511	363
Gobiidae	Tridentiger nudicervicus	Shiro-chichibu	marine	Temperate		9620	0
Gobiidae	Tridentiger trigonocephalus	Chameleon goby	marine	Temperate		1693	31171
					Total	964886	2034354

## Sheet: Table S3
Table S3. % contribution of each species to the Bray Curtis dissimilarity metric between two seasons identified by SIMPER analysis
Species	Av. dissim	Contrib. %	Cumulative %	Summer	Autumn
Acanthopagrus schlegelii	10.81	14.8	14.8	13800	34400
Pagrus major	9.531	13.05	27.85	10800	21100
Engraulis japonicus	7.148	9.784	37.63	7550	14500
Mugil cephalus	6.346	8.686	46.32	5130	17000
Sillago japonica	5.388	7.376	53.7	1740	13900
Siganus fuscescens	3.314	4.536	58.23	3830	8160
Lateolabrax japonicus	2.491	3.41	61.64	5160	1780
Acentrogobius pflaumii	2.47	3.381	65.02	1330	5890
Epinephelus akaara	1.994	2.73	67.75	1330	4320
Neoclinus chihiroe	1.485	2.033	69.79	400	3530
Takifugu pardalis	1.447	1.981	71.77	1570	2790
Takifugu niphobles	1.252	1.714	73.48	1870	1710
Konosirus punctatus	1.214	1.662	75.14	2740	276
Semicossyphus reticulatus	1.098	1.503	76.65	479	2120
Stephanolepis cirrhifer	1.059	1.449	78.1	406	2550
Tridentiger trigonocephalus	1.038	1.421	79.52	130	2400
Sebastiscus marmoratus	1.036	1.418	80.93	1330	1700
Hyporhamphus sajori	0.9894	1.354	82.29	1980	306
Parablennius yatabei	0.8906	1.219	83.51	121	1870
Seriola quinqueradiata	0.7944	1.087	84.6	0	1800
Ditrema temminckii	0.6612	0.9051	85.5	1290	420
Myersina filifer	0.6473	0.886	86.39	765	663
Planiliza haematocheilus	0.6362	0.8709	87.26	1020	698
Parajulis poecilepterus	0.6331	0.8667	88.12	1220	314
Sardinella lemuru	0.6275	0.8589	88.98	0	1560
Sardinella zunasi	0.57	0.7802	89.76	444	1070
Plectorhinchus cinctus	0.5565	0.7618	90.53	0	969
Acanthopagrus latus	0.4688	0.6417	91.17	286	779
Girella punctata	0.4077	0.5582	91.73	395	637
Istigobius hoshinonis	0.3881	0.5312	92.26	397	693
Tridentiger nudicervicus	0.3727	0.5102	92.77	740	0
Thamnaconus modestus	0.3725	0.5099	93.28	809	27.9
Omobranchus punctatus	0.3574	0.4893	93.77	137	704
Rudarius ercodes	0.336	0.4599	94.23	90.9	734
Sebastes sp.	0.2943	0.4029	94.63	336	487
Favonigobius gymnauchen	0.2916	0.3991	95.03	513	231
Muraenesox cinereus	0.2911	0.3985	95.43	292	431
Paralichthys olivaceus	0.2599	0.3557	95.78	0	434
Pleuronichthys cornutus	0.2501	0.3423	96.12	479	0

## Sheet: Table S4
Table S4. Venn results of fish family detect by eDNA on Ikuchijima vs catch method of previous studies
Sample	Total	Family
Overlapping between Previous studies vs Ikuchijima Island	11	Lateolabracidae
		Stichaeidae
		Hexagrammidae
		Monacanthidae
		Gobiidae
		Blenniidae
		Platycephalidae
		Sebastidae
		Tetraodontidae
		Girellidae
		Cottidae
Ikuchijima Island	31	Cynoglossidae
		Clupeidae
		Engraulidae
		Hemiramphidae
		Pleuronectidae
		Cepolidae
		Tripterygiidae
		Muraenesocidae
		Mugilidae
		Siganidae
		Congridae
		Serranidae
		Leiognathidae
		Sphyraenidae
		Haemulidae
		Callionymidae
		Atherinidae
		Carangidae
		Scombridae
		Synodontidae
		Labridae
		Labrisomidae
		Sparidae
		Dussumieriidae
		Paralichthyidae
		Pinguipedidae
		Belonidae
		Embiotocidae
		Plotosidae
		Sciaenidae
		Sillaginidae
Previous studies	3	Syngnathidae
		Tetrarogidae
		Gobliidae

## Sheet: Table S5
Table S5. Fish species detect by eDNA on Ikuchijima vs previous studies
Location	Method	No. species	Time survey	Site	Species/site	Habitat type	Source
Almirante Bay, Caberibbean coast of Panama	eDNA	79	3 months	19	4.15789	Coastal bay	[44]
Maizuru Bay, Japan	eDNA	128	1 day	47	2.7234	Coastal bay	[15]
Pearl River Delta, Hong Kong	eDNA	22	1 day	15	1.46667	Coastal estuarine	[53]
Pearl River Estuary, China	eDNA	115	2 months	16	7.1875	Coastal estuarine	[100]
Gulf of St. Lawrence, Canada	eDNA	71	2 months	84	0.845238	Coastal gulf	[23]
Ikuchijima Island, Japan	eDNA	72	2 days	13	5.53846	Coastal island	This study
Southeast sea of Korea, Korea	eDNA	43	6 months	10	4.3	Coastal shelf	[14]
Southern coastal of Korea, Korea	eDNA	114	2 days	25	4.56	Coastal shelf	[8]
The central Pacific Ocean	eDNA	73	1 day	28	2.60714	Open ocean	[7]
